# Supplementary material for: Combined Use of Presepsin and (1,3)-β-D-glucan as Biomarkers for Diagnosing Candida Sepsis and Monitoring the Effectiveness of Treatment in Critically Ill Patients
Source: MDPI journal article supplement (doi:10.3390/jof8030308), 2022-03-17
Supplement: s1 [file s1]

# Supplementary Information: Combined use of presepsin and (1,3)- $\beta$ -D-glucan as biomarkers for diagnosing *Candida* sepsis and monitoring the effectiveness of treatment in critically ill patients

Radim Dobiáš<sup>1,2,†</sup>, Marcela Káňová<sup>3,4,5,\*</sup>, Naděžda Petejová<sup>6,7,8</sup>, Štefan Kis Pisti<sup>9</sup>, Robert Bocek<sup>10</sup>, Eva Krejčí<sup>1,2</sup>, Helena Stružková<sup>2</sup>, Michaela Cachová<sup>1</sup>, Hana Tomášková<sup>11,12</sup>, Petr Hamal<sup>13</sup>, Vladimír Havlíček<sup>14,15,†</sup> and Milan Raška<sup>16,†</sup>

<sup>1</sup> Department of Bacteriology and Mycology, Public Health Institute in Ostrava, 702 00 Ostrava, Czech Republic; radim.dobias@zuova.cz (R.D.); eva.krejci@zuova.cz (E.K.); michaela.cachova@zuova.cz (M.C.)

<sup>2</sup> Institute of Laboratory Medicine, Faculty of Medicine, University of Ostrava, 703 00 Ostrava, Czech Republic; helcastruzkova@seznam.cz (H.S.)

<sup>3</sup> Department of Anesthesiology and Intensive Care Medicine, University Hospital Ostrava, 708 00 Ostrava, Czech Republic

<sup>4</sup> Institute of Physiology and Pathophysiology, Faculty of Medicine, University of Ostrava, 710 00 Ostrava, Czech Republic

<sup>5</sup> Department of Intensive Medicine, Emergency Medicine and Forensic Studies, University of Ostrava, 710 00 Ostrava, Czech Republic

<sup>6</sup> Department of Internal Medicine, University Hospital Ostrava, 708 00 Ostrava, Czech Republic; petejova@seznam.cz (N.P.)

<sup>7</sup> Department of Internal Medicine, University of Ostrava, 703 00 Ostrava, Czech Republic

<sup>8</sup> Department of Internal Medicine III – Nephrology, Rheumatology and Endocrinology, Faculty of Medicine and Dentistry, Palacký University Olomouc, 775 15 Olomouc, Czech Republic

<sup>9</sup> Department of Anesthesiology and Resuscitation, Ostrava City Hospital, 728 80 Ostrava, Czech Republic; kispisti@seznam.cz (Š.K.P.)

<sup>10</sup> Department of Anesthesiology and Resuscitation, Hospital with Polyclinic Havířov, 736 01 Havířov, Czech Republic; robert.bocek@nsphav.cz (R.B.)

<sup>11</sup> Center of Health Services, Institute of Public Health in Ostrava, 702 00 Ostrava, Czech Republic; hana.tomaskova@zuova.cz (H.T.)

<sup>12</sup> Department of Epidemiology and Public Health, Faculty of Medicine, University of Ostrava, 703 00 Ostrava, Czech Republic,

<sup>13</sup> Department of Microbiology, Faculty of Medicine and Dentistry, Palacký University Olomouc, 775 15 Olomouc, Czech Republic; petr.hamal@fnol.cz (P.H.)

<sup>14</sup> Institute of Microbiology of the Czech Academy of Sciences, 142 20 Prague, Czech Republic; vlhavlic@bio-med.cas.cz (V.H.)

<sup>15</sup> Department of Analytical Chemistry, Faculty of Science, Palacký University, 771 46 Olomouc, Czech Republic

<sup>16</sup> Department of Immunology, Faculty of Medicine and Dentistry, Palacký University Olomouc, 775 15 Olomouc, Czech Republic; milan.raska@upol.cz (M.R.)

\* Correspondence: marcela.kanova@fno.cz (M.K.)

† R.D. and M.K.; V.H. and M.R. contributed equally to this article

\* Correspondence: Data on the kinetics of presepsin justifying the choice of sampling window (within 24 h before indexed blood culture) used in the study

**S1: Data on the kinetics of presepsin justifying the choice of sampling window (within 24 h before indexed blood culture) used in the study**

Presepsin (PSEP) is a collective term for a group of soluble CD14 subtypes (sCD14-ST) that indicate an infectious agent's myelomonocytic activation. PSEP is formed and released into the blood when the cell surface membrane protein mCD14 is cleaved by proteases. In addition to myelomonocytes, hepatocytes and cells in the kidneys and lungs also respond sensitively to the presence of endotoxin by secreting sCD14 [42,43]. PSEP is detectable as early as one hour after endotoxin exposure, with peak levels occurring 3 hours after exposure [44,45]. As such, the PSEP response is faster than that of procalcitonin (PCT), whose levels only begin rising 2–4 hours after exposure [34], and C-reactive protein (CRP), whose levels start growing 12 hours after exposure and reach a maximum at 20–72 hours [46]. The biological half-life of PSEP (five hours) is also shorter than that of PCT (20–24 hours) [44]. These properties make PSEP a valuable early laboratory biomarker of sepsis, and its short biological half-life means that it can be used to evaluate the effectiveness of antibiotic treatments. Both PSEP and PCT can also be used to determine when to discontinue antibiotic therapy: treatment can be halted once their levels fall by more than 80% from the peak value (for PCT, this will typically be below 0.5 µg/mL) [34,44–49].

PSEP is present at very low concentrations in healthy individuals: the reference interval was 55–184 pg/mL, with a slight difference between men and women, in an Italian study [50] on 200 healthy individuals without signs of inflammatory reaction. Its concentration is significantly higher in patients with a systemic inflammatory response [47,51–53]. As with PCT, PSEP levels increase with age [44,47,48] and are also higher in neonates [54].

Multicenter studies have shown that the sensitivity (87.8%) and specificity (81.4%) of PSEP as a biomarker are maximized when using a cut-off value of 600 pg/mL; the use of a lower cut-off increased sensitivity but reduced specificity. PSEP also has a good negative predictive value: levels <200 pg/mL practically rule out systemic infection, and bacterial infection is very unlikely at levels <300 pg/mL. The concentration of PSEP in patients suffering from systemic inflammatory response syndrome of infectious etiology (i.e., a simple infection) is typically lower than in cases of sepsis, where the immune response to an infectious agent leads to the development of organ failure. Its concentrations are highest in patients undergoing septic shock; concentrations ≥ 1,000 pg/mL corresponds to a SOFA score ≥ 8 and have a high predictive value as an indicator of likely sepsis progression to septic shock with multiorgan failure [34,48].

**Table S1.** Correlations of biomarkers and clinical scores with 28-day mortality reveal significant differences with regard to candidemia (n = 58).

Significant differences in SOFA score, CRP, PCT and PSEP. PSEP is significantly correlated with PCT (Spearman's rho = 0.5811, p = 0.0182).

| Death | Test/Score | Centile | Mean   | SD     | Min  | Max   | p-value |
|-------|------------|---------|--------|--------|------|-------|---------|
| No    | APACHE II  | 11      | 14.1   | 7.6    | 7    | 33    | 0.0549  |
| Yes   | APACHE II  | 18      | 17.6   | 6.1    | 7    | 26    |         |
| No    | SOFA       | 3       | 5.0    | 4.3    | 2    | 18    | 0.0117  |
| Yes   | SOFA       | 7.5     | 8.1    | 4.7    | 2    | 16    |         |
| No    | BDG        | 1014    | 851.9  | 356.5  | 106  | 1307  | 0.3541  |
| Yes   | BDG        | 1119.5  | 892.6  | 419.4  | 104  | 1334  |         |
| No    | CRP        | 98      | 107.5  | 61.6   | 30   | 330   | 0.0034  |
| Yes   | CRP        | 145     | 173.4  | 86.4   | 55   | 338   |         |
| No    | PCT        | 1.4     | 5.9    | 16.7   | 0.24 | 100   | 0.0370  |
| Yes   | PCT        | 2.5     | 4.6    | 6.0    | 0.5  | 24.87 |         |
| No    | PSEP       | 1393    | 2013.0 | 1507.7 | 362  | 5950  | 0.0048  |
| Yes   | PSEP       | 3236.5  | 4263.8 | 4101.2 | 800  | 16899 |         |

SOFA Self Organ Failure Assessment score, APACHE II Acute Physiology, and Chronic Health Evaluation II score PCT procalcitonin, PSEP prepsin, CRP C-reactive protein.

Two-sample Wilcoxon rank-sum (Mann-Whitney) test

**Table S2.** Multivariable logistic regression analysis of the predictive value for mortality of prepsin and procalcitonin in invasive candidiasis patients.

**Prepsin is significantly more accurate than PCT.**

| Test/Deaths        | Odds Ratio | Std. Err. | z     | P>(z) | 95% CI    |
|--------------------|------------|-----------|-------|-------|-----------|
| PCT/1.078656       | 0.9150811  | 0.0767836 | -1.06 | 0.290 | 0.7763115 |
| PSEP/1.001088      | 1.000608   | 0.0002445 | 2.49  | 0.013 | 1.000129  |
| Cons/0.386521<br>8 | 0.1147259  | 0.0710987 | -3.49 | 0.000 | 0.0340525 |

PCT procalcitonin, PSEP prepsin, CI confidence interval, Cons contras.

**Table S3.** The distribution of (1,3)- $\beta$ -D-glucan and prepsin concentrations in patients with different origins of candidemia.

The results of the Kruskal-Wallis equality-of-populations rank test presented in the table below indicate that (1,3)- $\beta$ -D-glucan has significant value for differentiating between groups 0, 1, and 2 ( $P < 0.001$ ). Conversely, prepsin has no potential for resolving groups 0, 1, and 2 ( $P = 0.5375$ ).

| Patients without catheter colonization |                                         |                 |                  |
|----------------------------------------|-----------------------------------------|-----------------|------------------|
| Blood culture<br>Group 1               | Catheter, PICC/days<br>before/after IBC | BDG (pg/mL) IBC | PSEP (pg/mL) IBC |
| <i>C. parapsilosis</i>                 | NC                                      | 850             | 837              |
| <i>C. albicans</i>                     | NC                                      | 838             | 1851             |
| <i>C. albicans</i>                     | NC                                      | 1033            | 5544             |
| <i>C. tropicalis</i>                   | NC                                      | 1179            | 1786             |
| <i>C. albicans</i>                     | NC                                      | 1085            | 2287             |
| <i>C. krusei</i>                       | NC                                      | 1220            | 1647             |
| <i>C. albicans</i>                     | NC                                      | 1026            | 5664             |
| <i>C. parapsilosis</i>                 | NC                                      | 1087            | 1783             |
| <i>G. clavatum</i>                     | NC                                      | 200             | 3578             |
| <i>C. glabrata</i>                     | NC                                      | 1057            | 800              |
| <i>C. albicans</i>                     | NC                                      | 1185            | 16,899           |

|                          |    |      |        |
|--------------------------|----|------|--------|
| <i>C. albicans</i>       | NC | 1239 | 5676   |
| <i>C. tropicalis</i>     | NC | 399  | 1325   |
| <i>C. albicans</i>       | NC | 104  | 1945   |
| <i>C. glabrata</i>       | NC | 400  | 2785   |
| <i>C. krusei</i>         | NC | 1100 | 1371   |
| <i>C. albicans</i>       | NC | 839  | 714    |
| <i>C. glabrata</i>       | NC | 593  | 2468   |
| <i>C. albicans</i>       | NC | 1077 | 1381   |
| <i>C. tropicalis</i>     | NC | 1247 | 3259   |
| <i>C. albicans</i>       | NC | 942  | 3542   |
| <i>C. albicans</i>       | NC | 843  | 12,603 |
| <i>C. cerevisiae</i>     | NC | 1111 | 1393   |
| <i>C. tropicalis</i>     | NC | 457  | 3222   |
| <i>C. albicans</i>       | NC | 367  | 3831   |
| <i>C. albicans</i>       | NC | 1334 | 3214   |
| <i>C. krusei</i>         | NC | 1155 | 740    |
| <i>C. krusei</i>         | NC | 1140 | 800    |
| <i>C. krusei</i>         | NC | 1231 | 845    |
| <i>C. krusei</i>         | NC | 1065 | 1477   |
| <i>C. krusei</i>         | NC | 1002 | 876    |
| <i>C. metapsilosis</i>   | NC | 692  | 1393   |
| <i>C. guilliermondii</i> | NC | 229  | 1109   |
| <i>C. tropicalis</i>     | NC | 1014 | 1380   |
| <i>C. tropicalis</i>     | NC | 1010 | 1178   |
| <i>C. tropicalis</i>     | NC | 1176 | 843    |

Catheter-related candidiasis - candidemia detected after culture-confirmed catheter colonization

| Blood culture Group 2  | Catheter, PICC/days before/after IBC | BDG (pg/mL) IBC | PSEP (pg/mL) IBC |
|------------------------|--------------------------------------|-----------------|------------------|
| <i>C. glabrata</i>     | <i>C. glabrata</i> /3/NC             | 478             | 5513             |
| <i>C. parapsilosis</i> | <i>C. parapsilosis</i> /3/NC         | 485             | 3829             |
| <i>C. glabrata</i>     | <i>C. glabrata</i> /1/NC             | 500             | 1203             |
| <i>C. albicans</i>     | <i>C. albicans</i> /3/NC             | 465             | 1252             |
| <i>C. parapsilosis</i> | <i>C. parapsilosis</i> /1/NC         | 410             | 927              |
| <i>C. tropicalis</i>   | <i>C. tropicalis</i> /1/NC           | 266             | 2781             |
| <i>C. albicans</i>     | <i>C. tropicalis</i> /1/NC           | 457             | 3222             |
| <i>C. albicans</i>     | <i>C. albicans</i> /1/NC             | 511             | 1715             |
| <i>C. albicans</i>     | <i>C. albicans</i> /1/NC             | 514             | 944              |
| <i>C. glabrata</i>     | <i>C. glabrata</i> /1/NC             | 106             | 1511             |

Catheter colonization confirmed 1-3 days after proof of candidemia by culture

| Blood culture Group 3 | Catheter, PICC/days before/after IBC | BDG (pg/mL) IBC | PSEP (pg/mL) IBC |
|-----------------------|--------------------------------------|-----------------|------------------|
| <i>C. albicans</i>    | <i>C. albicans</i> /NC/2             | 577             | 1121             |
| <i>C. tropicalis</i>  | <i>C. tropicalis</i> /NC/2           | 1146            | 2567             |
| <i>C. albicans</i>    | <i>C. albicans</i> /NC/2             | 1095            | 1185             |
| <i>C. albicans</i>    | <i>C. albicans</i> /NC/2             | 1115            | 2581             |
| <i>C. tropicalis</i>  | <i>C. tropicalis</i> /NC/2           | 1307            | 1300             |
| <i>C. lusitaniae</i>  | <i>C. lusitaniae</i> /NC/3           | 1251            | 1292             |

|                      |                            |      |        |
|----------------------|----------------------------|------|--------|
| <i>C. albicans</i>   | <i>C. albicans</i> /NC/2   | 1223 | 4424   |
| <i>C. tropicalis</i> | <i>C. tropicalis</i> /NC/2 | 1133 | 1972   |
| <i>C. albicans</i>   | <i>C. albicans</i> /NC/2   | 1182 | 10,817 |
| <i>C. albicans</i>   | <i>C. albicans</i> /NC/2   | 1270 | 2325   |
| <i>C. albicans</i>   | <i>C. albicans</i> /NC/2   | 1239 | 3708   |
| <i>C. albicans</i>   | <i>C. albicans</i> /NC/2   | 1253 | 5950   |

ICB indexed blood culture, NC not colonized.

**1:**Patients without catheter colonization.

**2:**Candidemia detected after culture-confirmed catheter colonization (Catheter-related candidiasis).

**3:**Catheter colonization confirmed 1-3 days after proof of candidemia by culture.

**Table S4.** Monitoring successful treatment of invasive candidiasis using biomarkers.

The concentrations of BDG ( $P = 0.0038$ ) were significantly reduced on day 28; PSEP showed a significant decrease on day 14 ( $P = 0.0012$ ). Biomarker monitoring was performed in patients on days 3, 14, and 28 after initiating echinocandin therapy.

| Test_atm_day | n  | median | mean   | SD      | Min  | Max  | P-value |
|--------------|----|--------|--------|---------|------|------|---------|
| BDG          | 17 | 1091   | 1009.8 | 259.45  | 478  | 1307 |         |
| BDG_atm_3    | 17 | 1009.5 | 982.6  | 305.85  | 395  | 1551 |         |
| BDG_atm_14   | 17 | 1100   | 916.4  | 330.09  | 232  | 1240 | 0.2484  |
| BDG_atm_28   | 17 | 817    | 750.3  | 388.59  | 84   | 1342 | 0.0038  |
| CRP          | 17 | 117    | 151.05 | 93.942  | 47   | 338  |         |
| CRP_atm_3    | 17 | 142.8  | 149.8  | 105.11  | 23   | 388  |         |
| CRP_atm_14   | 17 | 91.5   | 98.6   | 58.67   | 4    | 189  | 0.0642  |
| CRP_atm_28   | 17 | 86     | 83.5   | 62.45   | 1    | 212  | 0.0347  |
| PSEP         | 15 | 1786   | 2595.7 | 1713.13 | 837  | 5664 |         |
| PSEP_atm_3   | 15 | 1381   | 2012.8 | 1565.68 | 651  | 5747 |         |
| PSEP_atm_14  | 15 | 873    | 1072.3 | 838.28  | 305  | 3100 | 0.0012  |
| PSEP_atm_28  | 15 | 649    | 602.9  | 288.62  | 165  | 1235 | 0.0012  |
| PCT          | 15 | 2.5    | 13.1   | 25.73   | 0.5  | 100  |         |
| PCT_atm_3    | 15 | 1.92   | 8.8    | 21.44   | 0.64 | 85   |         |
| PCT_atm_14   | 15 | 1.05   | 4.6    | 7.26    | 0.12 | 23.3 | 0.1914  |
| PCT_atm_28   | 15 | 0.92   | 42.1   | 101.23  | 0.08 | 307  | 0.8647  |

**Wilcoxon signed-rank test** - comparison with value on day 3.

**atm** treatment of invasive candidiasis with echinocandins.
